# Supplementary material
Source: PubMed Central journal article supplement (PMC3272261)
Supplement: cc1024_4300SD1.pdf [file cc1024_4300SD1.pdf]

## Supplementary Material

### **Involvement of the nuclear proteasome activator PA28 $\gamma$ in the cellular response to DNA double-strand breaks**

Adva Levy-Barda<sup>1</sup>, Yaniv Lerenthal<sup>1</sup>, Anthony J. Davis<sup>2</sup>, Young Min Chung<sup>3</sup>, Jeroen Essers<sup>4</sup>, Zhengping Shao<sup>2</sup>, Nicole van Vliet<sup>4</sup>, David J. Chen<sup>2</sup>, Mickey C-T. Hu<sup>3</sup>, Roland Kanaar<sup>4</sup>, Yael Ziv<sup>1</sup>, and Yosef Shiloh<sup>1</sup>

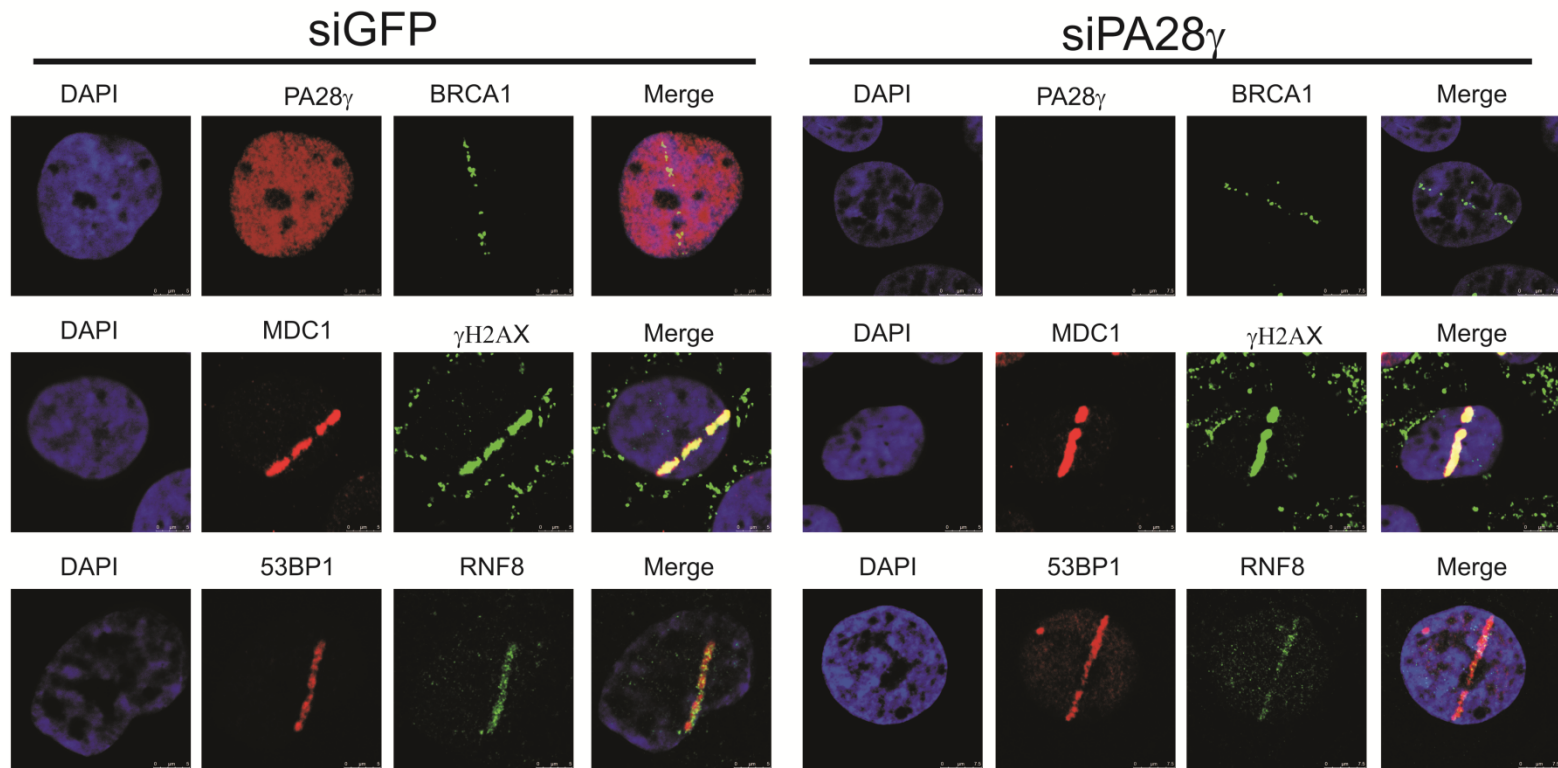

**Figure S1. Depletion of PA28 $\gamma$  does not influence the recruitment of MDC1, RNF8 or BRCA1 to DNA damage sites.** Localized DNA damage was induced in U2OS cells using a focused laser microbeam. The cells were fixed 5 min after damage induction and stained with the indicated antibodies.

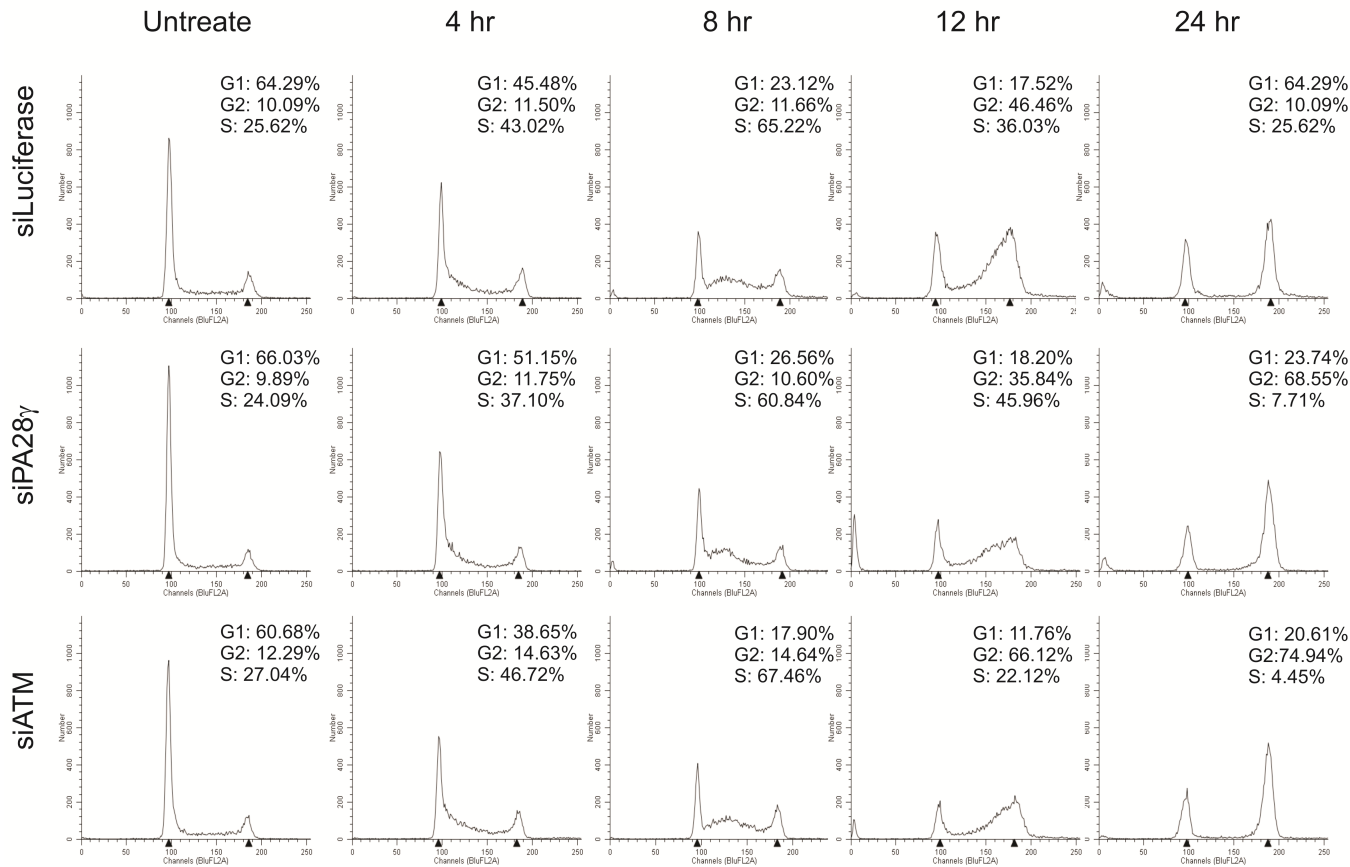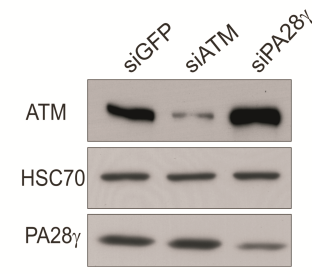

**Figure S2. Involvement of PA28 $\gamma$  in the S-phase checkpoint.** Left panel: Cell cycle analysis of U2OS cells 72 hr after transfection with siPA28 $\gamma$  or siLuciferase and siATM as control. Cells were treated with 50 ng/ml of NCS 72 hr after siRNA transfection, and analyzed at various time points using flow cytometry. Right panel: Western blotting analysis showing the extend of protein depletion 72 hr after siRNA transfection. Results of one of three independent experiments are shown

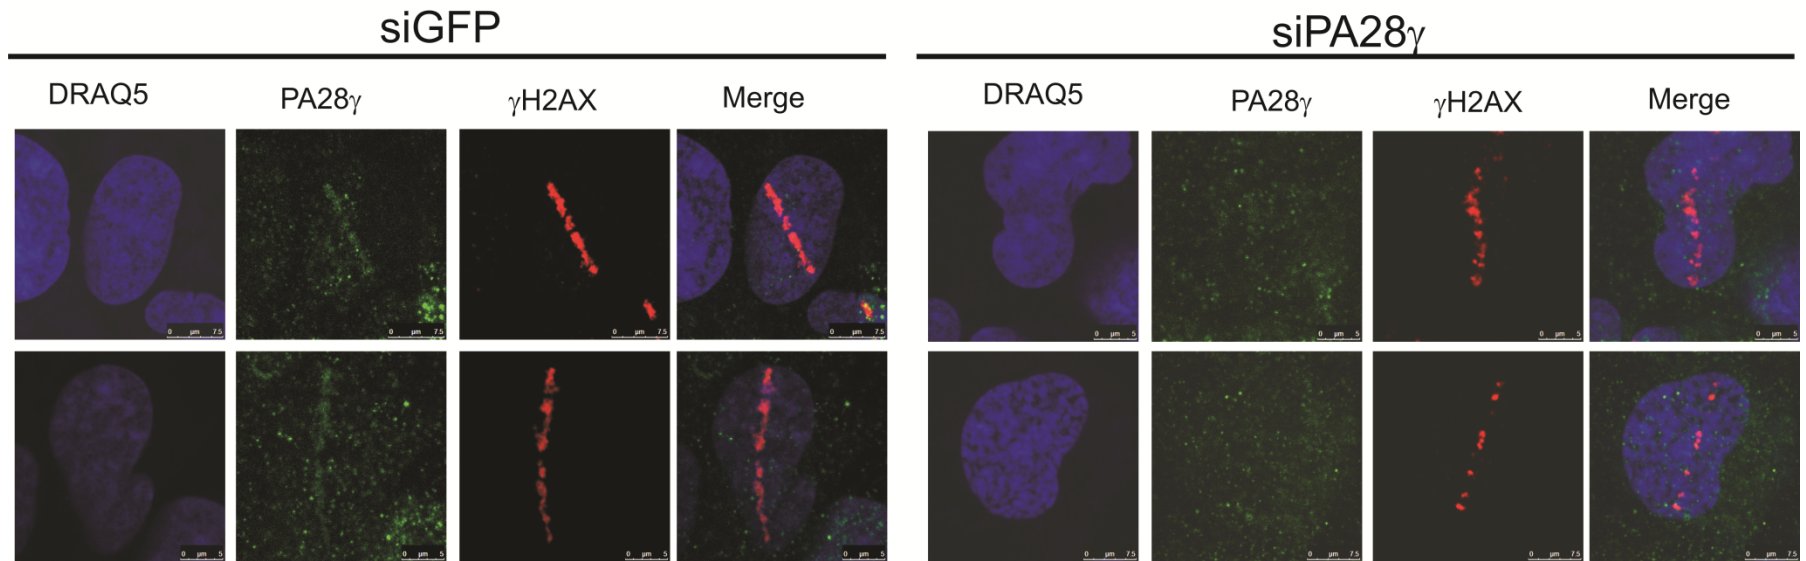

**Figure S3. Specificity of the antibody against PA28 $\gamma$ .** U2OS cells were transfected with siRNAs against GFP or PA28 $\gamma$ , and localized DNA damage was induced using a laser microbeam 72 hr later. The cells were treated with 0.25% NP40, fixed and co-stained with antibodies against PA28 $\gamma$  and  $\gamma$ H2AX.



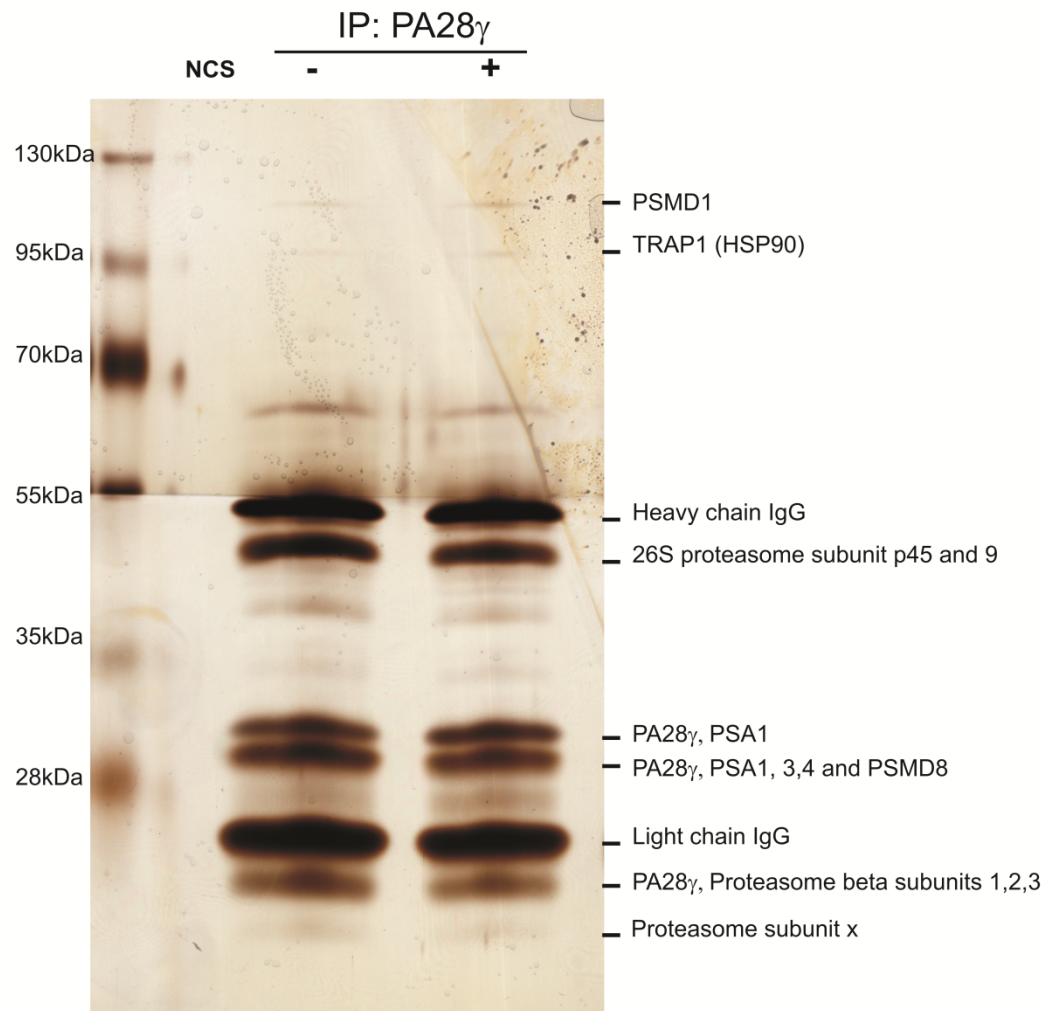

**Figure S4. Stable interaction between PA28 $\gamma$  and proteasome subunits is not affected by DNA damage.** HEK293 cells were treated with 200 ng/ml of NCS for 1 hr, endogenous PA28 $\gamma$  was immunoprecipitated and the immune complexes were separated using SDS-PAGE. Proteins were identified by mass spectrometry.

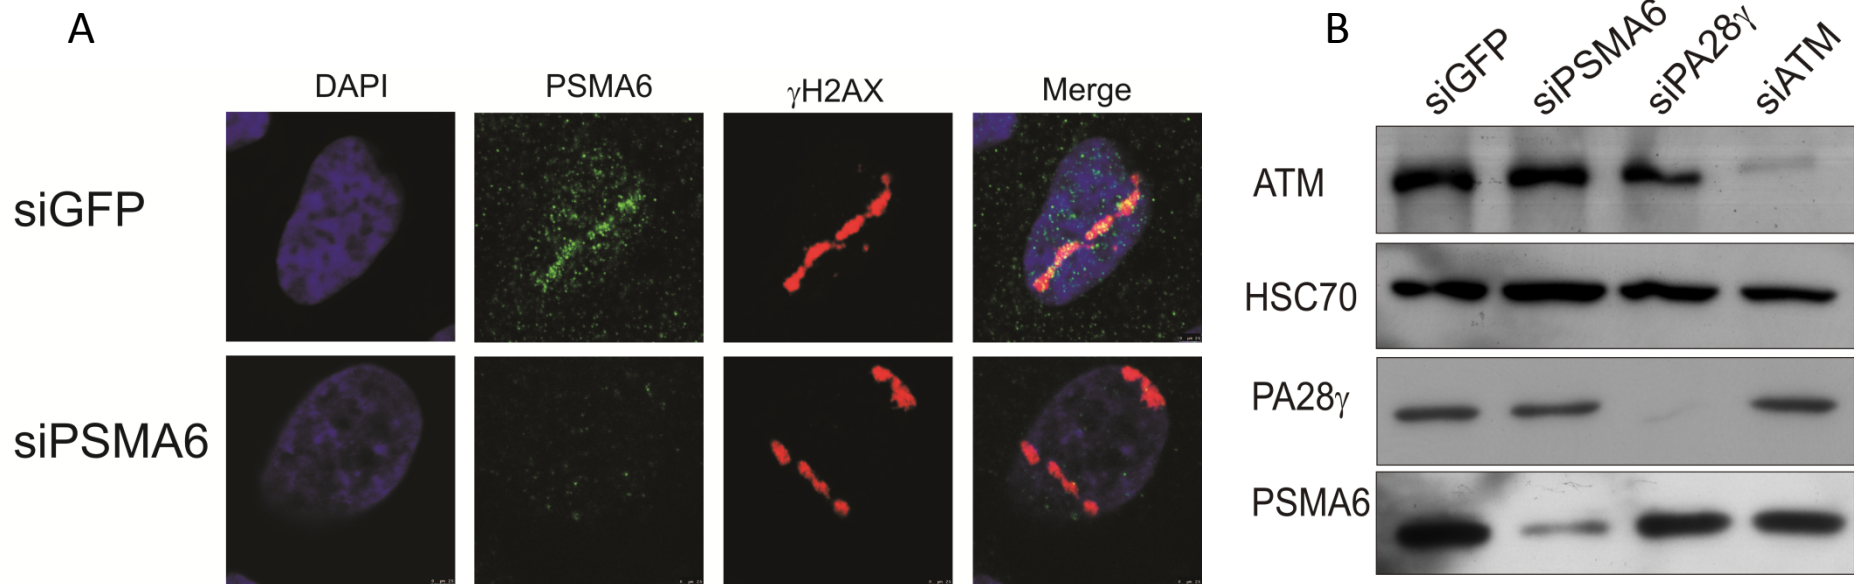

**Figure S5. Specificity of the antibody against PSMA6.** (A) U2OS cells were transfected with siRNA against GFP or PSMA6, localized DNA damage was induced using a laser microbeam 72 hr later, and the cells were co-stained with antibodies against PSMA6 and  $\gamma$ H2AX. (B) Western blotting analysis shows the extent of gene silencing in this experiment.

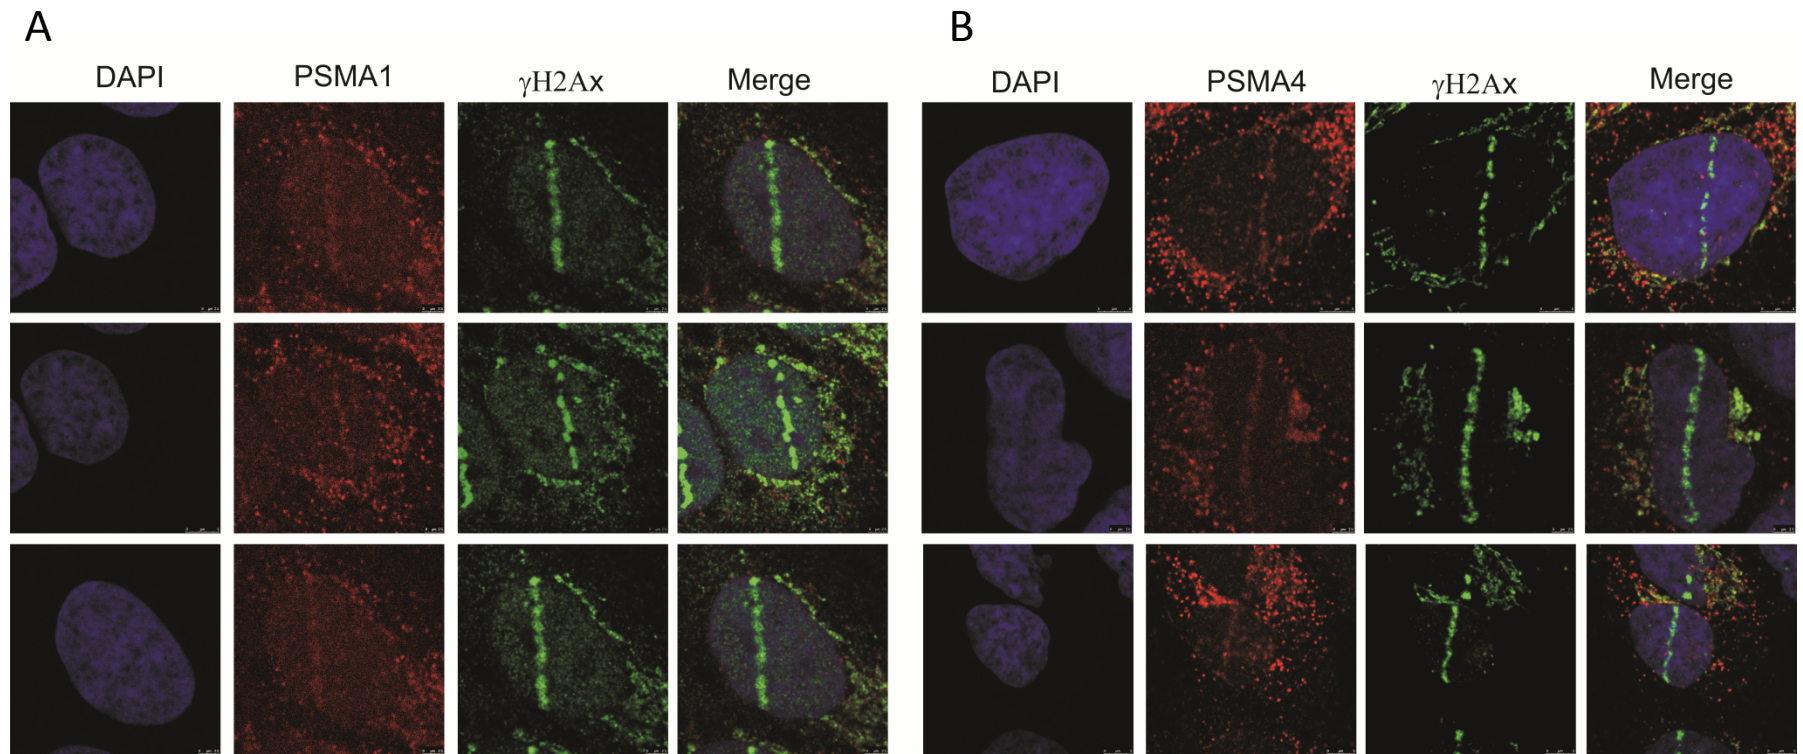

**Figure S6. Recruitment of the 20S proteasome subunits to DNA damage sites.**

Localized DNA damage was induced using a laser microbeam in U2OS cells. The cells were co-stained with antibodies against 20S proteasome subunits PSMA1 (A), PSMA4 (B) and  $\gamma$ H2AX.
